# Supplementary material for: TERT Promoter Mutations Differently Correlate with the Clinical Outcome of MAPK Inhibitor-Treated Melanoma Patients
Source: MDPI journal article supplement (doi:10.3390/cancers12040946), 2020-04-11
Supplement: s1 [file s1]

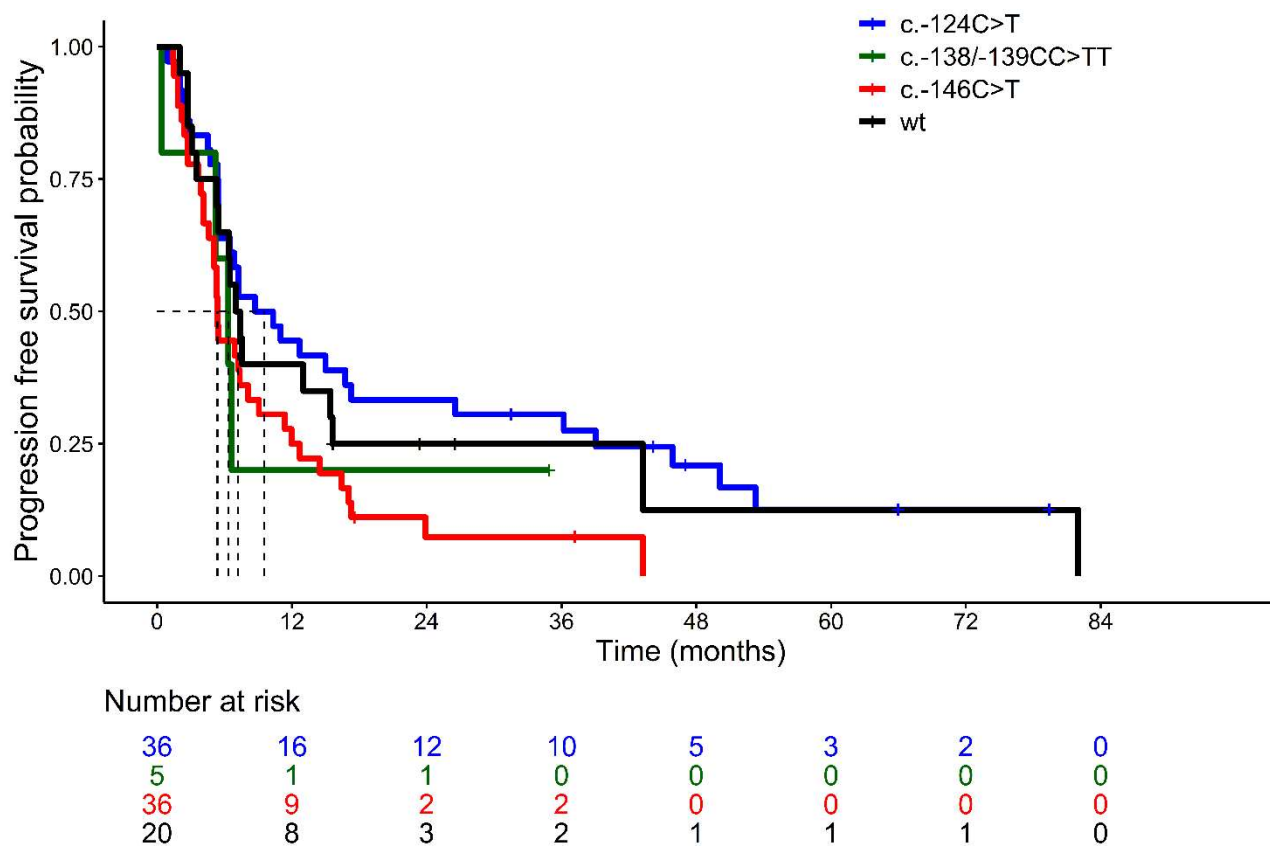

**Figure S1.** Kaplan-Meier curve showing progression free survival in the patients stratified by TERTprom mutations. The dotted lines reveal the median survival time.

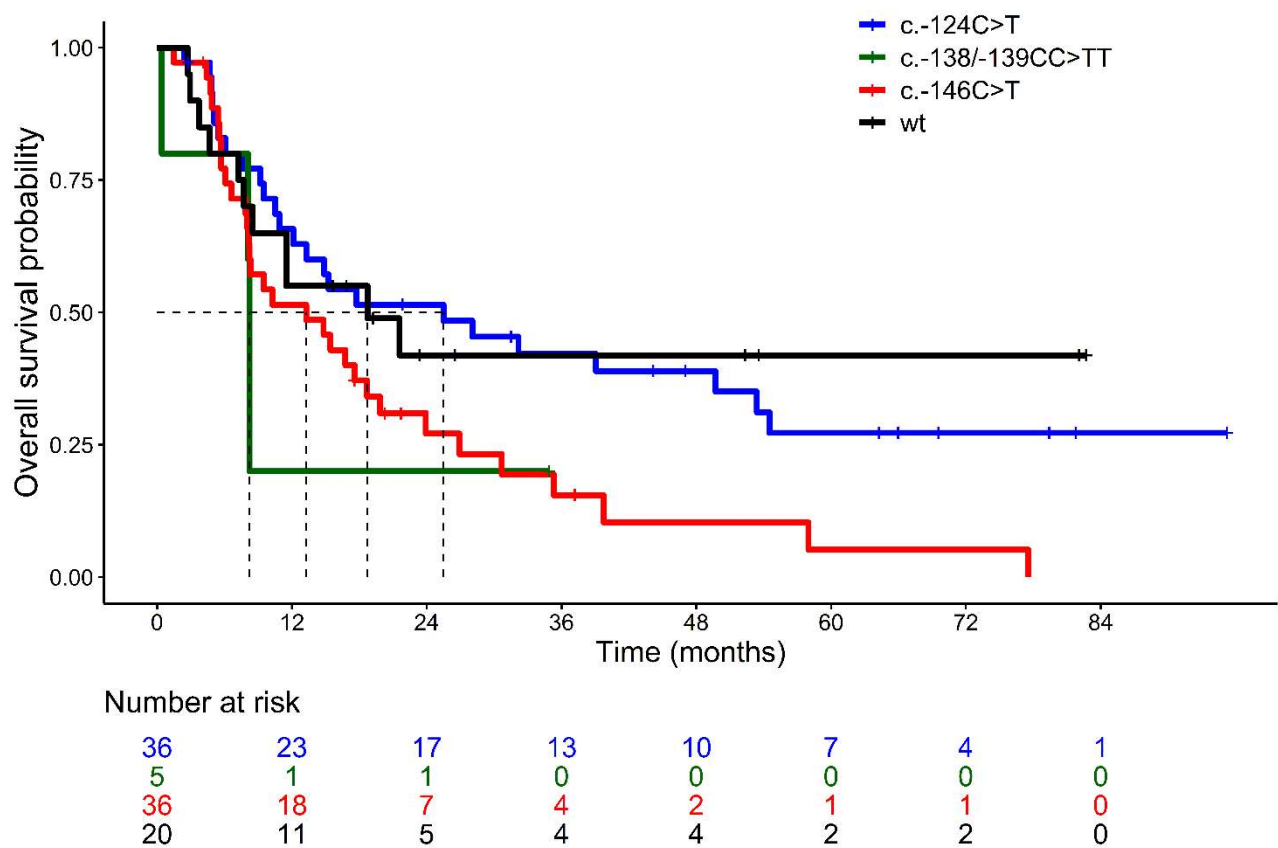

**Figure S2.** Kaplan-Meier curve showing overall survival in the patients stratified by TERTprom mutations. The dotted lines reveal the median survival time.
